# Supplementary material for: Mechanical strain determines the site-specific localization of inflammation and tissue damage in arthritis
Source: PubMed Central journal article supplement (PMC6218475; doi:10.1038/s41467-018-06933-4), 2018-11-05
Supplement: 41467_2018_6933_MOESM6_ESM.pdf [file 41467_2018_6933_MOESM6_ESM.pdf]

## Reporting Summary

Nature Research wishes to improve the reproducibility of the work that we publish. This form provides structure for consistency and transparency in reporting. For further information on Nature Research policies, see [Authors & Referees](#) and the [Editorial Policy Checklist](#).

### Statistical parameters

When statistical analyses are reported, confirm that the following items are present in the relevant location (e.g. figure legend, table legend, main text, or Methods section).

n/a Confirmed

- The exact sample size ( $n$ ) for each experimental group/condition, given as a discrete number and unit of measurement
- An indication of whether measurements were taken from distinct samples or whether the same sample was measured repeatedly
- The statistical test(s) used AND whether they are one- or two-sided  
*Only common tests should be described solely by name; describe more complex techniques in the Methods section.*
- A description of all covariates tested
- A description of any assumptions or corrections, such as tests of normality and adjustment for multiple comparisons
- A full description of the statistics including central tendency (e.g. means) or other basic estimates (e.g. regression coefficient) AND variation (e.g. standard deviation) or associated estimates of uncertainty (e.g. confidence intervals)
- For null hypothesis testing, the test statistic (e.g.  $F$ ,  $t$ ,  $r$ ) with confidence intervals, effect sizes, degrees of freedom and  $P$  value noted  
*Give  $P$  values as exact values whenever suitable.*
- For Bayesian analysis, information on the choice of priors and Markov chain Monte Carlo settings
- For hierarchical and complex designs, identification of the appropriate level for tests and full reporting of outcomes
- Estimates of effect sizes (e.g. Cohen's  $d$ , Pearson's  $r$ ), indicating how they were calculated
- Clearly defined error bars  
*State explicitly what error bars represent (e.g. SD, SE, CI)*

*Our web collection on [statistics for biologists](#) may be useful.*

### Software and code

Policy information about [availability of computer code](#)

Data collection

*Provide a description of all commercial, open source and custom code used to collect the data in this study, specifying the version used OR state that no software was used.*

Data analysis

*Provide a description of all commercial, open source and custom code used to analyse the data in this study, specifying the version used OR state that no software was used.*

For manuscripts utilizing custom algorithms or software that are central to the research but not yet described in published literature, software must be made available to editors/reviewers upon request. We strongly encourage code deposition in a community repository (e.g. GitHub). See the Nature Research [guidelines for submitting code & software](#) for further information.

### Data

Policy information about [availability of data](#)

All manuscripts must include a [data availability statement](#). This statement should provide the following information, where applicable:

- Accession codes, unique identifiers, or web links for publicly available datasets
- A list of figures that have associated raw data
- A description of any restrictions on data availability

*Provide your data availability statement here.*

## Field-specific reporting

Please select the best fit for your research. If you are not sure, read the appropriate sections before making your selection.

Life sciences  Behavioural & social sciences  Ecological, evolutionary & environmental sciences

For a reference copy of the document with all sections, see [nature.com/authors/policies/ReportingSummary-flat.pdf](https://www.nature.com/authors/policies/ReportingSummary-flat.pdf)

## Life sciences study design

All studies must disclose on these points even when the disclosure is negative.

|                 |                                                                                                                                                                                                                                                                                                                                                                                                                                       |
|-----------------|---------------------------------------------------------------------------------------------------------------------------------------------------------------------------------------------------------------------------------------------------------------------------------------------------------------------------------------------------------------------------------------------------------------------------------------|
| Sample size     | To calculate sample size we performed a G-Power analysis on data gathered with CAIA and CIA to determine necessary sample size. We included parameters as means and calculate effect size with a two-tailed test. The sample size of the mice experiments was not altered during the experiments.                                                                                                                                     |
| Data exclusions | They were followed during all the experiments. The only exclusion data to be mentioned are the following. For determining the incidence only scores of at least 0.5 (=inflamed toe) were considered. Similarly, data on inflammation associated bone erosion were conducted with mice that had a clinical score of $\geq 1$ on the scanned hind paw under various conditions. We have no (not shown) outliers to be reported.         |
| Replication     | Each mouse experiment was repeated twice with similar outcomes. All data are from biological different samples and all in vitro experiments were repeated at least four times.                                                                                                                                                                                                                                                        |
| Randomization   | In the CIA and CAIA mice experiments the equal age male mice were divided randomly on base of weight and initial cage number in the three different conditions (voluntary running, control and unloading). For the RAG2 <sup>-/-</sup> experiments comparable aged male and female mice were used, and were randomly divided into the conditions, no differences are observed between the gender types.                               |
| Blinding        | Allocation was done randomly. During the experiment mice were checked daily for healthy conditions and every two days they were scored for clinical symptoms by two experienced independent investigators. Clinical scoring was done respectively semi- and full blinded by two experienced investigators (minimal differences observed between both), all further sample analyses like H&E, bone erosion and ELISA was done blinded. |

## Reporting for specific materials, systems and methods

### Materials & experimental systems

| n/a                                 | Included in the study                                           |
|-------------------------------------|-----------------------------------------------------------------|
| <input checked="" type="checkbox"/> | <input type="checkbox"/> Unique biological materials            |
| <input type="checkbox"/>            | <input checked="" type="checkbox"/> Antibodies                  |
| <input checked="" type="checkbox"/> | <input type="checkbox"/> Eukaryotic cell lines                  |
| <input checked="" type="checkbox"/> | <input type="checkbox"/> Palaeontology                          |
| <input type="checkbox"/>            | <input checked="" type="checkbox"/> Animals and other organisms |
| <input type="checkbox"/>            | <input checked="" type="checkbox"/> Human research participants |

### Methods

| n/a                      | Included in the study                              |
|--------------------------|----------------------------------------------------|
| <input type="checkbox"/> | <input type="checkbox"/> ChIP-seq                  |
| <input type="checkbox"/> | <input checked="" type="checkbox"/> Flow cytometry |
| <input type="checkbox"/> | <input type="checkbox"/> MRI-based neuroimaging    |

## Antibodies

|                 |                                                                                                                     |
|-----------------|---------------------------------------------------------------------------------------------------------------------|
| Antibodies used | All antibody information is shown in the Methods section.                                                           |
| Validation      | Validation was done of all flow cytometry antibodies on both cells and on beats in several exploratory experiments. |

## Animals and other organisms

Policy information about [studies involving animals](#); [ARRIVE guidelines](#) recommended for reporting animal research

|                    |                                                                                                                                                                                                                                                                                                                                                                                                                                           |
|--------------------|-------------------------------------------------------------------------------------------------------------------------------------------------------------------------------------------------------------------------------------------------------------------------------------------------------------------------------------------------------------------------------------------------------------------------------------------|
| Laboratory animals | All relevant information is shown in the methods section. CIA mice were C57BL/6 9-10 weeks old at the beginning of the experiment. TNFARE mice were all male and 6-9 weeks old when starting experiments. RAG2 <sup>-/-</sup> mice were 9-10 weeks and CCL2 <sup>-/-</sup> mice were 9 weeks old when starting the experiments. And finally comparable aged C57BL/6 mice used in CAIA were 10-12 weeks old when starting the experiments. |
| Wild animals       | Nothing to report                                                                                                                                                                                                                                                                                                                                                                                                                         |

Field-collected samples

Noting to report

## Human research participants

Policy information about [studies involving human research participants](#)

Population characteristics

X-Rays of feet were collected from a consecutive cohort of 63 RA patients with mean age 59.3 +/- 11.55, including 19 males and 44 females. HR-qQCT imaging was done on 5 healthy controls and 10 age- and gender-matched spondyloarthritis patients that fulfilled ASAS classification criteria. Human tendon samples were required by surgery for chronic Achilles tendinopathy, 7 independent samples were collected with a mean age of 52.7 +/- 2.95 years. As control (unloaded) samples we gathered samples of patients with a hemiplegia who required a surgical Achilles tendon lengthening because of spasticity, mean age was 3.4 +/- 20.7 years

Recruitment

Patients were recruited at the hospitals.

## ChIP-seq

Data deposition

Confirm that both raw and final processed data have been deposited in a public database such as [GEO](#).

Confirm that you have deposited or provided access to graph files (e.g. BED files) for the called peaks.

Data access links

May remain private before publication.

For "Initial submission" or "Revised version" documents, provide reviewer access links. For your "Final submission" document, provide a link to the deposited data.

Files in database submission

Provide a list of all files available in the database submission.

Genome browser session

(e.g. [UCSC](#))

Provide a link to an anonymized genome browser session for "Initial submission" and "Revised version" documents only, to enable peer review. Write "no longer applicable" for "Final submission" documents.

Methodology

Replicates

Describe the experimental replicates, specifying number, type and replicate agreement.

Sequencing depth

Describe the sequencing depth for each experiment, providing the total number of reads, uniquely mapped reads, length of reads and whether they were paired- or single-end.

Antibodies

Describe the antibodies used for the ChIP-seq experiments; as applicable, provide supplier name, catalog number, clone name, and lot number.

Peak calling parameters

Specify the command line program and parameters used for read mapping and peak calling, including the ChIP, control and index files used.

Data quality

Describe the methods used to ensure data quality in full detail, including how many peaks are at FDR 5% and above 5-fold enrichment.

Software

Describe the software used to collect and analyze the ChIP-seq data. For custom code that has been deposited into a community repository, provide accession details.

## Flow Cytometry

Plots

Confirm that:

- The axis labels state the marker and fluorochrome used (e.g. CD4-FITC).
- The axis scales are clearly visible. Include numbers along axes only for bottom left plot of group (a 'group' is an analysis of identical markers).
- All plots are contour plots with outliers or pseudocolor plots.
- A numerical value for number of cells or percentage (with statistics) is provided.

Methodology

Sample preparation

Samples were freshly collected from mice and processed immediately. Human samples were freshly collected and stored in medium for a limited time period, whereafter they were processed. Samples were digested with collagenases to be able to get single cell solution for flow cytometry.

Instrument

BD FACS Canto II

Software

FLOWJO versie 9

Cell population abundance

Gating strategy

Tick this box to confirm that a figure exemplifying the gating strategy is provided in the Supplementary Information.

## Magnetic resonance imaging

### Experimental design

Design type

Design specifications

Behavioral performance measures

### Acquisition

Imaging type(s)

Field strength

Sequence & imaging parameters

Area of acquisition

Diffusion MRI  Used  Not used

### Preprocessing

Preprocessing software

Normalization

Normalization template

Noise and artifact removal

Volume censoring

### Statistical modeling & inference

Model type and settings

Effect(s) tested

Specify type of analysis:  Whole brain  ROI-based  Both

Statistic type for inference (See [Eklund et al. 2016](#))

## Correction

*Describe the type of correction and how it is obtained for multiple comparisons (e.g. FWE, FDR, permutation or Monte Carlo).*

## Models & analysis

- | n/a                                 | Involvement in the study                                              |
|-------------------------------------|-----------------------------------------------------------------------|
| <input checked="" type="checkbox"/> | <input type="checkbox"/> Functional and/or effective connectivity     |
| <input checked="" type="checkbox"/> | <input type="checkbox"/> Graph analysis                               |
| <input checked="" type="checkbox"/> | <input type="checkbox"/> Multivariate modeling or predictive analysis |
